# Supplementary material for: Elk1 affects katanin and spastin proteins via differential transcriptional and post-transcriptional regulations
Source: PubMed Central journal article supplement (PMC6383945; doi:10.1371/journal.pone.0212518), 2019-02-21
Supplement: pone.0212518.s001.pdf [file pone.0212518.s001.pdf]

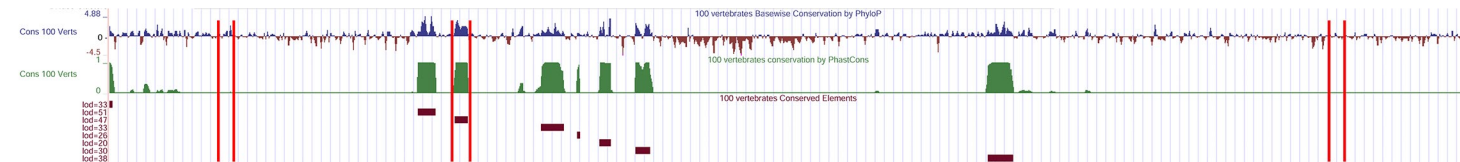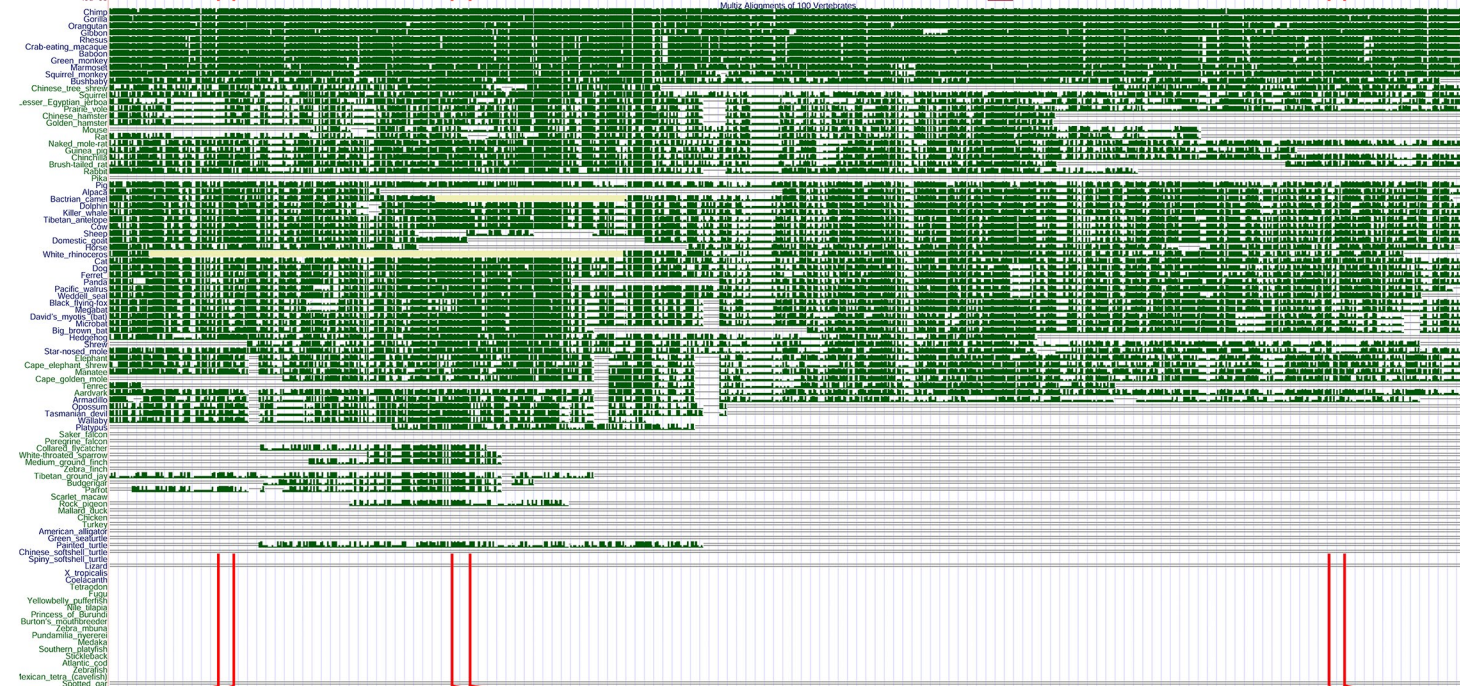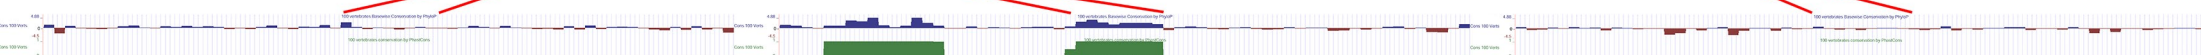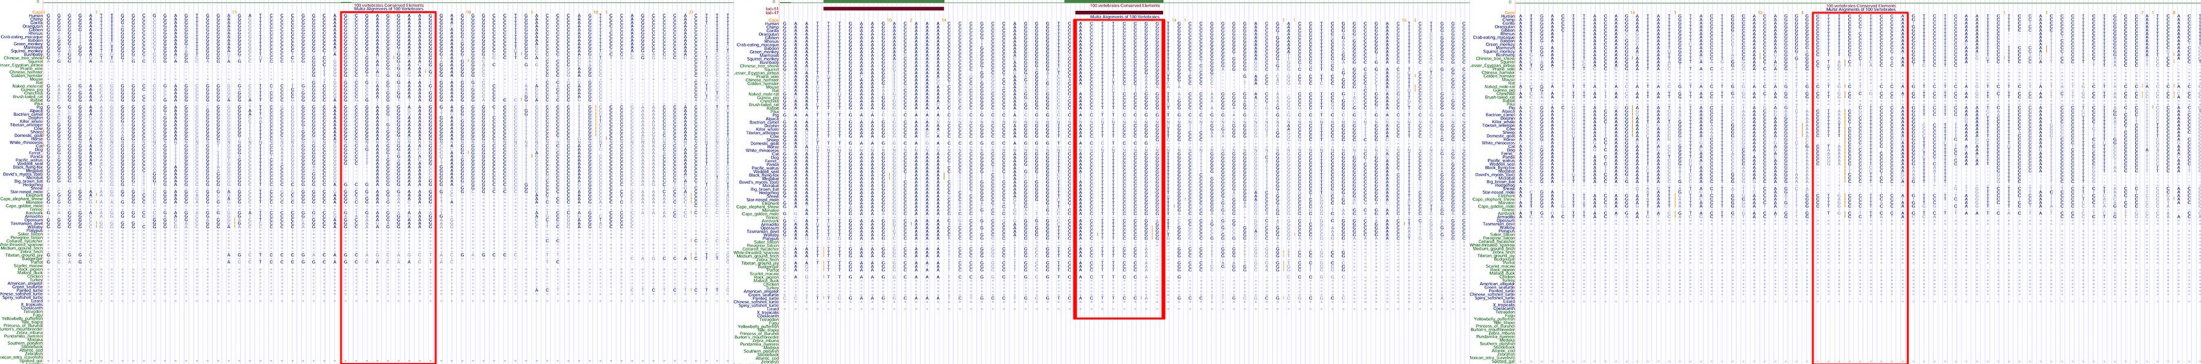

UTR2 (+253/+262)

UTR1 (+113/+122)

Promoter (-428/-419)
